# Supplementary material for: Dereplication of Components Coupled with HPLC-qTOF-MS in the Active Fraction of Humulus japonicus and It’s Protective Effects against Parkinson’s Disease Mouse Model
Source: PubMed Central journal article supplement (PMC6480934; doi:10.3390/molecules24071435), 2019-04-11
Supplement: molecules-24-01435-s001.pdf [file molecules-24-01435-s001.pdf]

# Dereplication of Components Coupled with HPLC-qTOF-MS in the Active Fraction of *Humulus japonicus* and its Protective Effects Against Parkinson's Disease Mouse Model

Hee Ju Lee <sup>1,2</sup>, Basanta Dhodary <sup>1</sup>, Ju Yong Lee <sup>1</sup>, Jin-Pyo An <sup>1</sup>, Young-Kyoung Ryu <sup>3</sup>,  
Kyoung-Shim Kim <sup>3</sup>, Chul-Ho Lee <sup>3</sup> and Won Keun Oh <sup>1,\*</sup>

<sup>1</sup> Korea Bioactive Natural Material Bank, Research Institute of Pharmaceutical Sciences, College of Pharmacy, Seoul National University, Seoul, 08826, Republic of Korea; hjlee81@kist.re.kr (H.J.L.); Basanta02@hotmail.com (B.D.); sbplee@snu.ac.kr (J.Y.L.); ntopjp77@gmail.com (J.-P.A.)

<sup>2</sup> Natural Product Informatics Research Center, Korea Institute of Science and Technology, Gangneung, 25451, Republic of Korea; hjlee81@kist.re.kr (H.J.L.)

<sup>3</sup> Laboratory Animal Resource Center, Korea Research Institute of Bioscience and Biotechnology (KRIBB), Daejeon 34141, Republic of Korea; mnc1208@kribb.re.kr (Y.-K.R.); kskim@kribb.re.kr (K.-S.K.); chullee@kribb.re.kr (C.-H.L.)

\* Correspondence: wkoh1@snu.ac.kr; Tel.: +82-2-880-7872

## Table of Contents

Experimental section

Fig. S1. HR-ESI-MS of compound 1.

Fig. S2. <sup>1</sup>H NMR spectrum (CD<sub>3</sub>OD, 500 MHz) of compound 1.

Fig. S3. <sup>13</sup>C NMR spectrum (CD<sub>3</sub>OD, 125 MHz) of compound 1.

Fig. S4. HSQC spectrum (CD<sub>3</sub>OD, 500 MHz) of compound 1.

Fig. S5. HMBC spectrum (CD<sub>3</sub>OD, 500 MHz) of compound 1.

## Experimental section

### *HPLC analysis*

The HPLC system was equipped with an Agilent Series 1260 liquid chromatography, equipped with G1322A vacuum degasser, G1312C binary pump, G1329B autosampler, and G1315D DAD detector, connected to Agilent ChemStation software (Agilent Technologies Co. Ltd., Waldbronn, Germany). An INNO C18 column (4.6 x 250 mm, 5  $\mu$ m, Young Jin Biochrom, Korea) were used. The gradient profile was as follows: 0-3 min, initial mobile phase 0.1% formic acid in acetonitrile/0.1% formic acid in water (10:90, %, v/v); 3-43 min, linear gradient 90:10 (%, v/v); 43-52 min, isocratic 100:0 (%, v/v); and stable steps to initial condition for 8 min. Flow rate was 0.6 ml/min and detection was at 254 nm. The injection volume of standards (luteolin-7-*O*-glucoside and apigenin-7-*O*-glucoside), HJ extracts and fraction was 10  $\mu$ l, respectively (HPLC chromatogram data not shown).

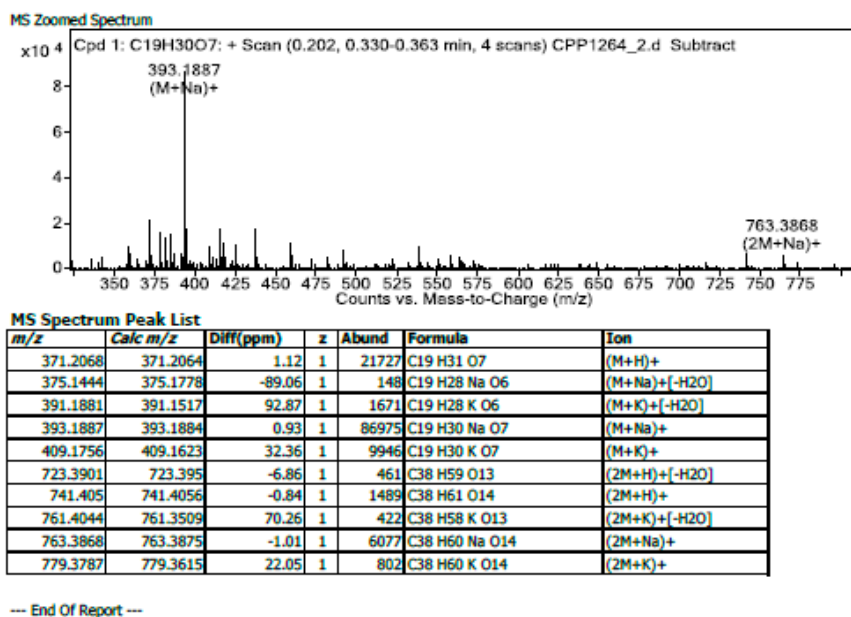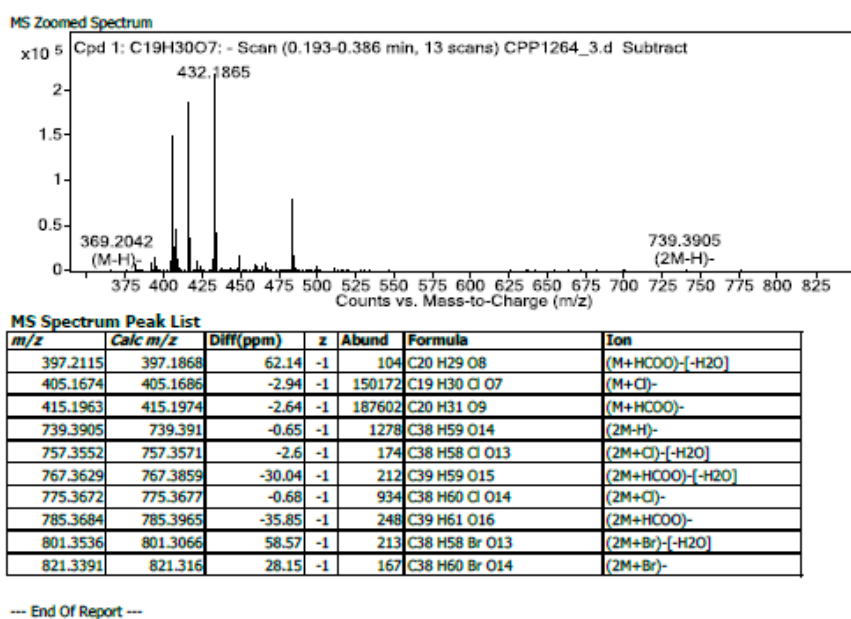

Fig. S1. HR-ESI-MS of compound 1.

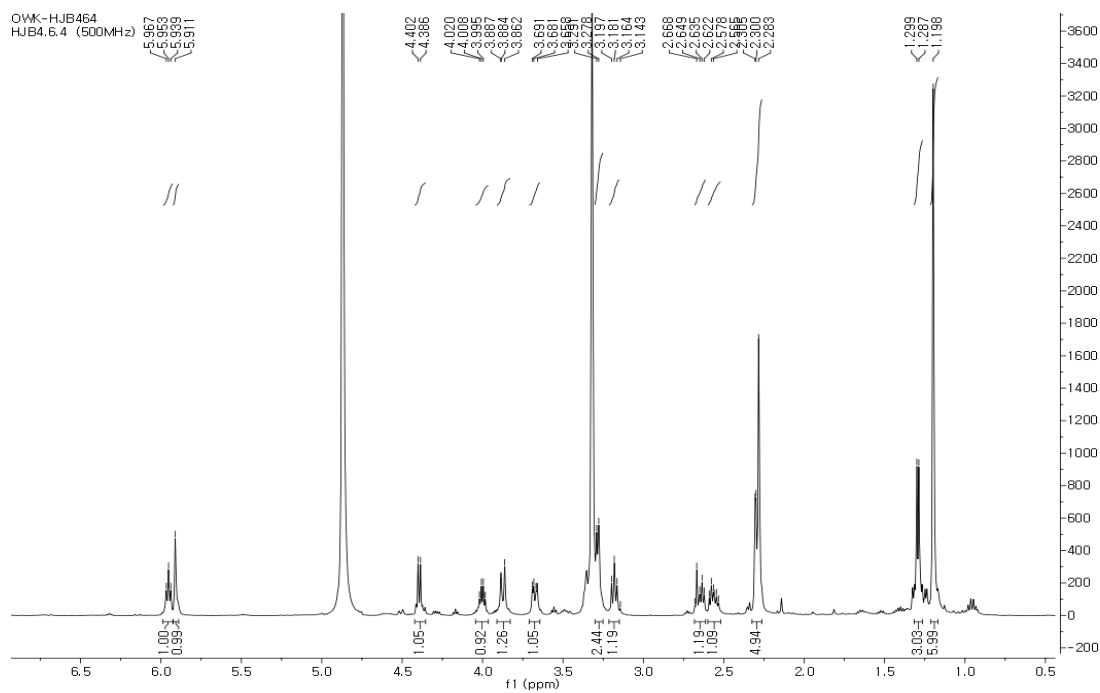

Fig. S2.  $^1\text{H}$  NMR spectrum ( $\text{CD}_3\text{OD}$ , 500 MHz) of compound 1.

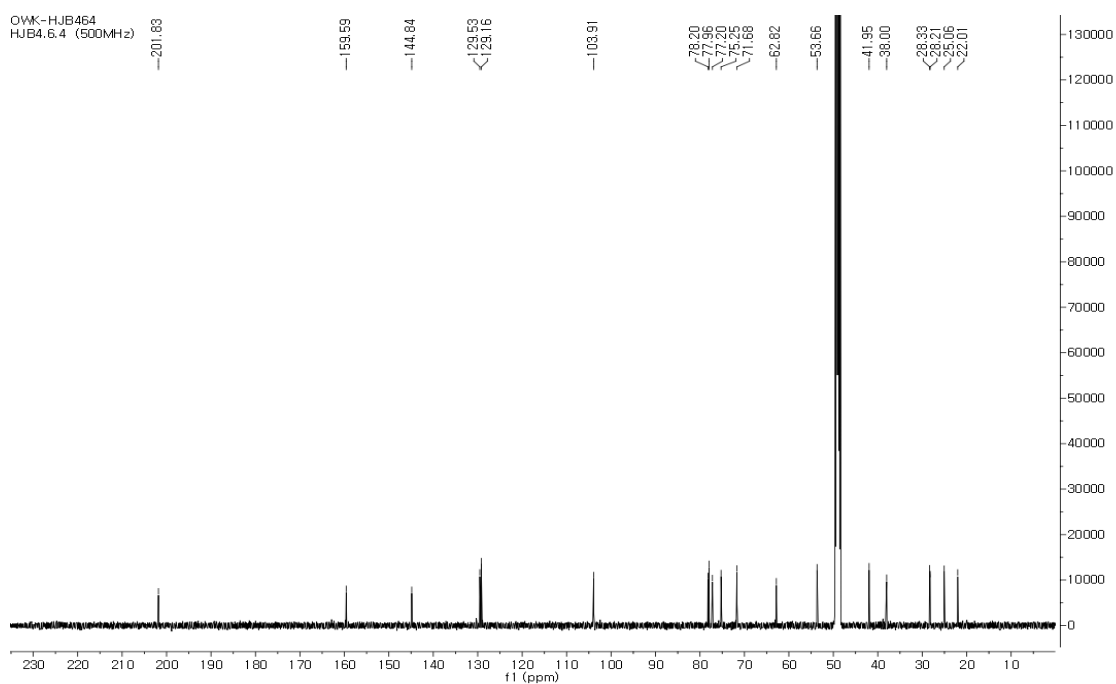

Fig. S3.  $^{13}\text{C}$  NMR spectrum ( $\text{CD}_3\text{OD}$ , 125 MHz) of compound 1.

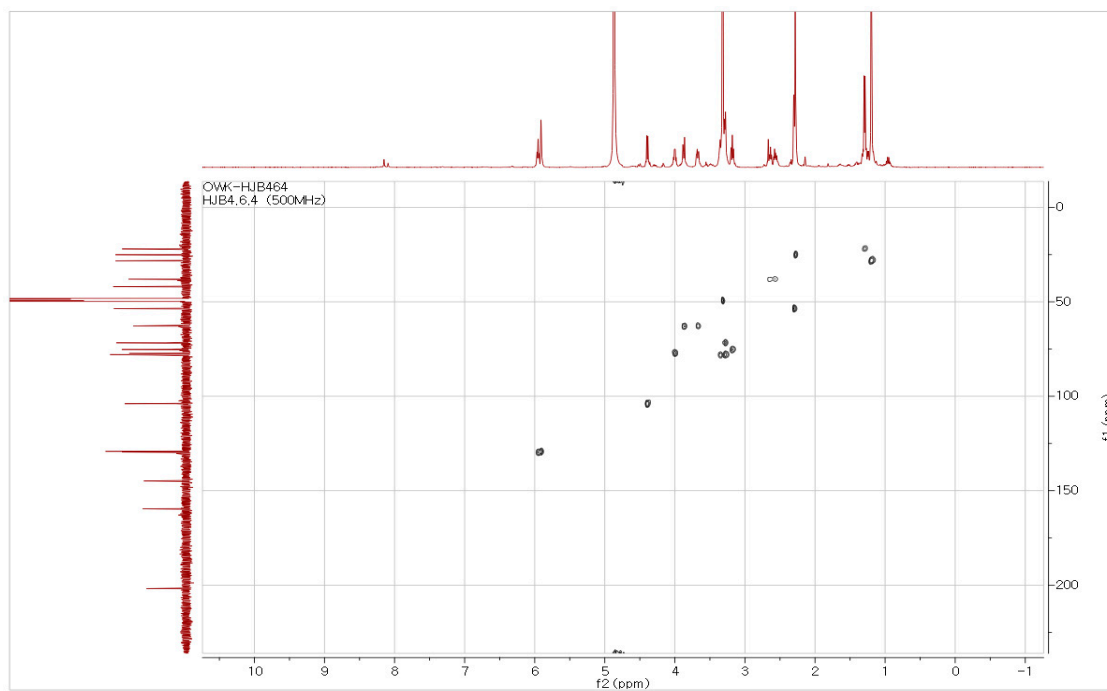

Fig. S4. HSQC spectrum ( $\text{CD}_3\text{OD}$ , 500 MHz) of compound 1.

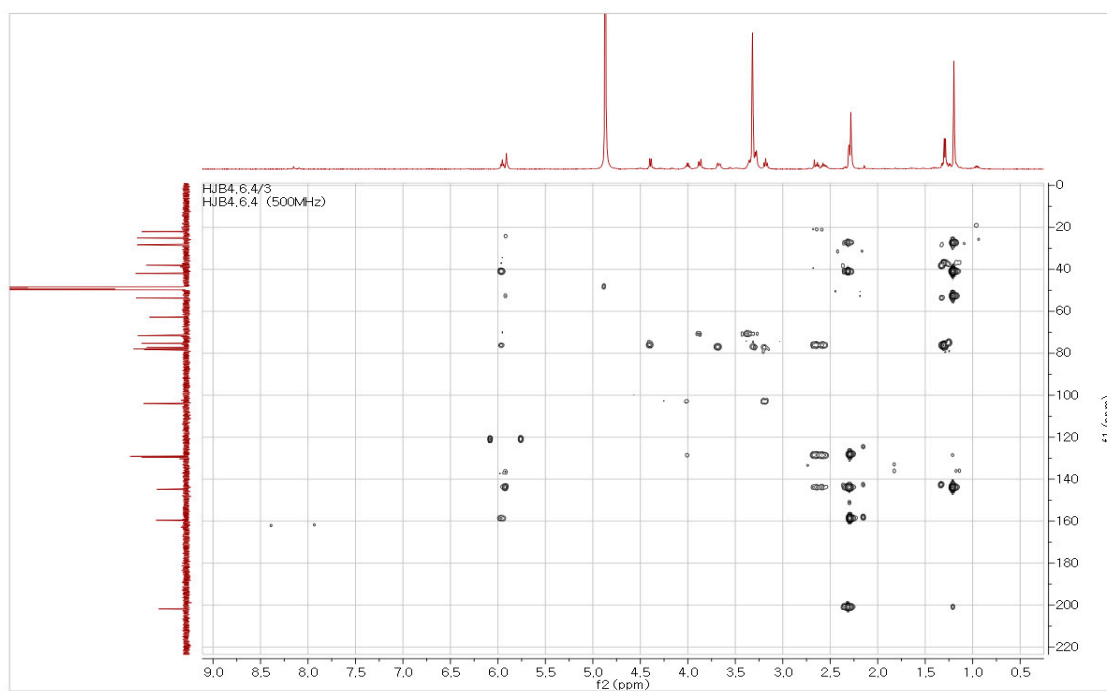

Fig. S5. HMBC spectrum ( $\text{CD}_3\text{OD}$ , 500 MHz) of compound 1.
